# Supplementary material for: Metal-seed planting fabrication of W–W18O49 core shell nanoflowers for gas sensors
Source: Royal Society of Chemistry journal article supplement (doi:10.1039/c7ra03006a), 2017-01-01
Supplement: c7ra03006a1.pdf [file c7ra03006a1.pdf]

## Supporting Information:

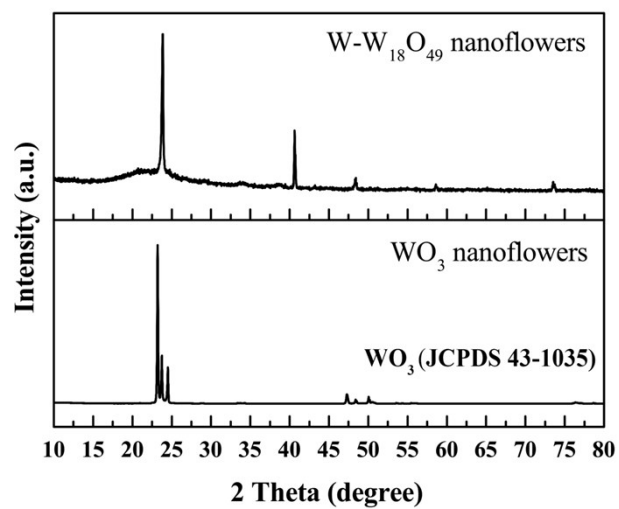

Fig. S1 XRD spectra for the sensors based on the nanoflowers before (above) and after (below) annealing in air respectively.

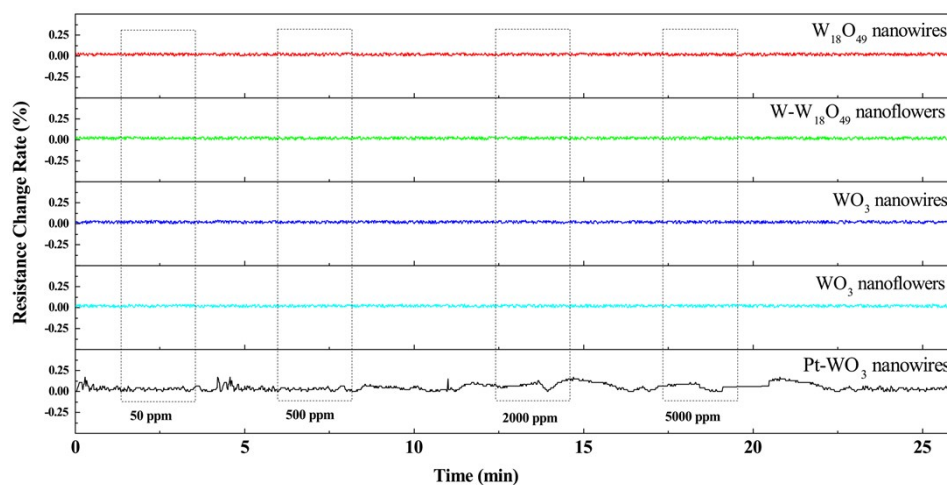

Fig. S2 Hydrogen sensing response curves for the sensors based on five different films (W<sub>18</sub>O<sub>49</sub> nanowires, W-W<sub>18</sub>O<sub>49</sub> nanoflowers, WO<sub>3</sub> nanowires, WO<sub>3</sub> nanoflowers, and Pt-WO<sub>3</sub> nanowires films) under the same test conditions at room temperature.

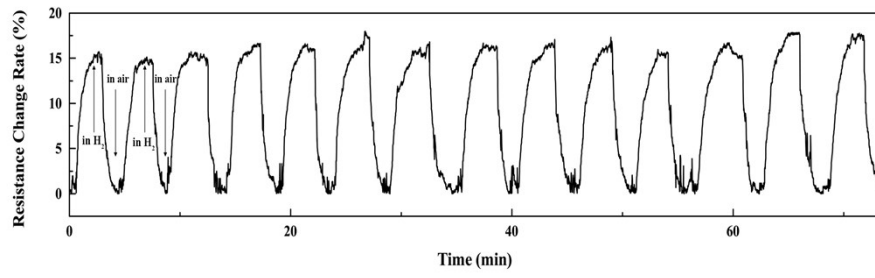

**Fig. S3** Cycle test curve for the sensor based on Pt-WO<sub>3</sub> nanoflowers carried out in a gas atmospheres switch between 2000 ppm hydrogen and air after 50 cycles.
